# Supplementary material
Source: publisher figshare collection journal article supplement (https://asha.figshare.com/articles/dataset/_/23900199)
Supplement: Supplementary file 1 [file 1]

Supplemental Material S3. Characteristics of included studies.

| Study and Reference          | Study Quality <sup>a</sup> | Country | Design <sup>b</sup>        | <i>n</i> <sup>c</sup> | Age Range  | Sex, M:F <sup>d</sup> | Diagnostic Method <sup>e</sup> | Ankyloglossia Severity                                              | Anterior: Posterior <sup>d</sup> | Comorbidities                                                                           | Outcomes Assessed                         |
|------------------------------|----------------------------|---------|----------------------------|-----------------------|------------|-----------------------|--------------------------------|---------------------------------------------------------------------|----------------------------------|-----------------------------------------------------------------------------------------|-------------------------------------------|
| Baxter, 2018                 | High                       | USA     | Case report, R             | 1                     | 9 y        | 1:0                   | Clinician                      | –                                                                   | 1:0                              | Autism (1)                                                                              | Speech, eating, sleep                     |
| Baxter & Hughes, 2018        | Medium                     | USA     | Case series, R             | 5                     | 17 m-11 y  | 3:2                   | Kotlow                         | Grade I (1),<br>Grade II (4)                                        | –                                | –                                                                                       | Speech, eating, swallowing, sleep         |
| Baxter et al., 2021          | Medium                     | USA     | Cohort/cross-sectional, P  | 314                   | 1-14.8 y   | 149:165               | TRMR                           | Grade I (80),<br>Grade II (161),<br>Grade III (64),<br>Grade IV (9) | –                                | Attention deficit hyperactivity disorder (45)                                           | Speech, eating, sleep                     |
| Baxter et al., 2020          | Medium                     | USA     | Pre-post, P                | 37                    | 13 m-12 y  | 23:14                 | Kotlow                         | –                                                                   | –                                | –                                                                                       | Speech, eating, swallowing, sleep         |
| Belmehdi et al., 2018        | Medium                     | Morocco | Case series, R             | 2                     | 13-15 y    | 1:1                   | Kotlow                         | Grade II (1)                                                        | –                                | Malocclusion (1)                                                                        | Speech, dental                            |
| Brooks et al., 2020          | High                       | USA     | Case report, R             | 1                     | 21 m       | 1:0                   | Clinician                      | –                                                                   | –                                | Respiratory infections (1)                                                              | Speech, eating, swallowing                |
| Brożek-Mądry et al., 2021    | Medium                     | Poland  | Case-control, P            | 20<br>(135)           | 4-17 y     | – <sup>g</sup>        | Kotlow                         | ≥ Grade I                                                           | –                                | –                                                                                       | Sleep                                     |
| Calvo-Henríquez et al., 2021 | Medium                     | Spain   | Case-control, P            | 50<br>(100)           | 4.1-14.9 y | 35:15                 | LFPI                           | 5.48 ± 1.47                                                         | 1:0                              | –                                                                                       | Dental                                    |
| Fioravanti et al., 2021      | High                       | Italy   | Controlled intervention, P | 32                    | 4-13 y     | 18:14                 | Kotlow                         | Mean free tongue length<br>17.315 ± 0.445 mm                        | 3:–                              | –                                                                                       | Sleep                                     |
| Fleiss et al., 1990          | Medium                     | USA     | Case series, R             | 1 <sup>f</sup>        | 13 y       | 1:0                   | Clinician                      | –                                                                   | –                                | –                                                                                       | Speech, eating                            |
| Govardhan et al., 2019       | High                       | USA     | Case report, R             | 1                     | 3.6 y      | 0:1                   | TRMR                           | Grade IV (1)                                                        | 1:0                              | Malocclusion, anterior-posterior maxillary deficiency, lip-tie, asthma (1)              | Speech, eating, swallowing, sleep, dental |
| Guilleminault et al., 2016   | Medium                     | USA     | Cohort/cross-sectional, R  | 63<br>(150)           | 3-12 y     | 34:29                 | Kotlow                         | ≥ Grade I                                                           | –                                | –                                                                                       | Speech, eating, swallowing, sleep         |
| Hamamci et al., 2010         | High                       | Turkey  | Case report, R             | 1                     | 13.8 y     | 1:0                   | Clinician                      | Complete                                                            | –                                | Malocclusion, reversed overjet, mandibular crowding, maxillary deficiency, diastema (1) | Speech, eating, social, dental            |

| Study and Reference     | Study Quality <sup>a</sup> | Country   | Design <sup>b</sup>        | <i>n</i> <sup>c</sup> | Age Range | Sex, M:F <sup>d</sup> | Diagnostic Method <sup>e</sup>  | Ankyloglossia Severity                                    | Anterior: Posterior <sup>d</sup> | Comorbidities                                                                            | Outcomes Assessed                         |
|-------------------------|----------------------------|-----------|----------------------------|-----------------------|-----------|-----------------------|---------------------------------|-----------------------------------------------------------|----------------------------------|------------------------------------------------------------------------------------------|-------------------------------------------|
| Huang et al., 2015      | Medium                     | USA       | Cohort/cross-sectional, R  | 27                    | 2-16 y    | 18:9                  | Clinician                       | –                                                         | –                                | Abnormal Mallampati-Friedman score (22), tonsillar hypertrophy (10), dental crowding (5) | Speech, eating, swallowing, sleep, dental |
| Jaiswal et al., 2022    | Medium                     | India     | Case series, R             | 4                     | 3-12 y    | 3:1                   | TRMR                            | Grade IV (2)                                              | –                                | Austism and cerebral palsy (1), dental caries (1)                                        | Speech, eating, social                    |
| Junqueira et al., 2014  | Medium                     | Brazil    | Case series, R             | 5                     | 2-11 y    | 3:2                   | Clinician                       | –                                                         | –                                | –                                                                                        | Speech, social                            |
| Melong et al., 2021     | Medium                     | Canada    | Pre/post, P                | 25                    | 24-87 m   | 20:5                  | Modified HATLFF                 | Moderate, severe                                          | –                                | –                                                                                        | Speech, eating                            |
| Messner & Lalakea, 2002 | Medium                     | USA       | Pre-post, P                | 30                    | 1-12 y    | 19:11                 | Tongue elevation and protrusion | Elevation 5.2 ± 5.6 mm; protrusion 14.2 ± 5.5 mm          | –                                | –                                                                                        | Speech, social, mechanical                |
| Nicholson, 1991         | Medium                     | Australia | Case series, R             | 2                     | 1.5-2.5 y | 2:0                   | Clinician                       | –                                                         | –                                | –                                                                                        | Speech, social                            |
| Oh et al., 2021         | Medium                     | USA       | Cohort/cross-sectional, P  | — <sup>g</sup> (96)   | 6-12 y    | — <sup>g</sup>        | Kotlow, TRMR                    | ≥ Grade I (Kotlow); TRMR Grade III-IV                     | –                                | Tonsillar hypertrophy, narrow palate                                                     | Sleep                                     |
| Pottamal et al., 2021   | Medium                     | India     | Case series, R             | 2                     | 7-9 y     | 1:1                   | Kotlow                          | Grade II (1)                                              | –                                | –                                                                                        | Speech                                    |
| Salt et al., 2020       | Medium                     | Australia | Cohort/cross-sectional, P  | 38 (59)               | 30-59 m   | 17:21                 | Clinician                       | –                                                         | 52:185                           | –                                                                                        | Speech                                    |
| Villa et al., 2020      | Medium                     | Italy     | Cohort/cross-sectional, P  | 114 (504)             | 6-14 y    | –                     | Kotlow                          | ≥ Grade I                                                 | –                                | Obesity (11.7%)                                                                          | Sleep                                     |
| Walls et al., 2014      | Medium                     | USA       | Cohort/cross-sectional, R  | 86 (104)              | 3 y       | –                     | Coryllos                        | Class I (20), Class II (44), Class III (22), Class IV (0) | –                                | –                                                                                        | Speech                                    |
| Yuen et al., 2022       | High                       | China     | Case-control, P            | 26 (82)               | 5-12 y    | — <sup>g</sup>        | Kotlow, tongue mobility         | ≥ Grade I (Kotlow); < 60% tongue mobility                 | –                                | –                                                                                        | Sleep                                     |
| Zhao et al., 2022       | Medium                     | China     | Controlled intervention, P | 341                   | 2-5 y     | 173:176               | Kotlow, BTAT                    | Grade III-IV (Kotlow); BTAT < 3                           | –                                | –                                                                                        | Speech                                    |

<sup>a</sup> Assessed using the National Heart, Lung, and Blood Institute (NHLBI) quality assessment tools. Ratings describe quality, not risk of bias.

<sup>b</sup> P: prospective, R: retrospective.

<sup>c</sup> Patients with ankyloglossia (any controls without ankyloglossia excluded). Total sample size given in parentheses if different from ankyloglossia-specific *n*.

<sup>d</sup> Values are raw counts.

<sup>e</sup> BTAT: Bristol Tongue Assessment Tool; HATLFF: Hazelbaker Assessment Tool for Lingual Frenulum Function; LFPI: Lingual Frenulum Protocol for Infants; TRMR: tongue range of motion ratio. “Clinician” indicates unstandardized manual and visual assessment.

<sup>f</sup> Infant and adult patient excluded.

<sup>g</sup> Not reported for the ankyloglossia subset.
