# Supplementary material
Source: publisher figshare collection journal article supplement (https://asha.figshare.com/articles/dataset/_/23900199)
Supplement: Supplementary file 3 [file 1]

## Supplemental Material S2. Search strategy.

| Database               | Terms                                                                                                                                                                                                                                                                                                                                                                                                                                                                                                                                                                                                                                                                                                         | Limitations                    | Results     |
|------------------------|---------------------------------------------------------------------------------------------------------------------------------------------------------------------------------------------------------------------------------------------------------------------------------------------------------------------------------------------------------------------------------------------------------------------------------------------------------------------------------------------------------------------------------------------------------------------------------------------------------------------------------------------------------------------------------------------------------------|--------------------------------|-------------|
| PubMed                 | ((("Ankyloglossia"[Mesh] OR "Ankyloglossia"[tw] OR frenulotom*[tw] OR frenotom*[tw] OR frenectom*[tw] OR frenulectom*[tw] OR frenuloplast*[tw] OR "tongue tied"[tw] OR "tongue tie"[tw] OR "tongue-tie"[tw] OR "short lingual frenum"[tw] OR "short lingual frenulum"[tw] OR "lingual fraenulum"[tw] OR "Lingual Frenum/abnormalities"[Mesh]) AND ((child OR children OR childhood OR pediatric* OR paediatric* OR infant* OR baby OR newborn* OR babies OR neonate* OR adolescent* OR adolescence OR teenager* OR teen* OR youth* OR toddler* OR preschool* OR "school age" or "school aged" OR juvenile*))) AND English[lang] AND ("1964/01/01"[PDAT] : "2021/10/30"[PDAT])                                 | English, 01/01/1964-10/30/2021 | 625         |
| Embase                 | Search 1: "frenulotomy"/exp OR "ankyloglossia"/exp OR "ankyloglossia" OR frenotom* OR frenectom* OR frenulectom* OR frenuloplast* OR "tongue tied" OR "tongue tie*" OR "tongue-tie*" OR "short lingual frenum" OR "short lingual frenulum" OR "lingual fraenulum" OR "lingual frenum" OR "tongue frenulum"/exp<br>Search 2: child OR children OR childhood OR pediatric* OR paediatric* OR infant* OR baby OR newborn* OR babies OR neonate* OR adolescent* OR adolescence OR teenager* OR teen* OR youth* OR toddler* OR preschool* OR "school age" OR "school aged" OR juvenile*<br>Search 3: Search 1 and 2<br>Search 4: Search 1 and 2 and [English]/lim                                                  | English, ≤ 2021                | 938         |
| CINAHL                 | ((("Ankyloglossia" OR "Ankyloglossia" OR frenulotom* OR frenotom* OR frenectom* OR frenulectom* OR frenuloplast* OR "tongue tied" OR "tongue tie*" OR "tongue-tie*" OR "short lingual frenum" OR "short lingual frenulum" OR "lingual fraenulum" OR "Lingual Frenum") ) AND ( ((child OR children OR childhood OR pediatric* OR paediatric* OR infant* OR baby OR newborn* OR babies OR neonate* OR adolescent* OR adolescence OR teenager* OR teen* OR youth* OR toddler* OR preschool* OR "school age" or "school aged" OR juvenile*))))                                                                                                                                                                    | English, ≤ 2021                | 399         |
| PsycInfo               | ((("Ankyloglossia" OR "Ankyloglossia" OR frenulotom* OR frenotom* OR frenectom* OR frenulectom* OR frenuloplast* OR "tongue tied" OR "tongue tie*" OR "tongue-tie*" OR "short lingual frenum" OR "short lingual frenulum" OR "lingual fraenulum" OR "Lingual Frenum") AND ((child OR children OR childhood OR pediatric* OR paediatric* OR infant* OR baby OR newborn* OR babies OR neonate* OR adolescent* OR adolescence OR teenager* OR teen* OR youth* OR toddler* OR preschool* OR "school age" or "school aged" OR juvenile*))))                                                                                                                                                                        | English, ≤ 2021                | 19          |
| Web of Science Classic | TOPIC: ("Ankyloglossia" OR "Ankyloglossia" OR frenulotom* OR frenotom* OR frenectom* OR frenulectom* OR frenuloplast* OR "tongue tied" OR "tongue tie*" OR "tongue-tie*" OR "short lingual frenum" OR "short lingual frenulum" OR "lingual fraenulum" OR "Lingual Frenum")<br>Refined by: TOPIC: (child OR children OR childhood OR pediatric* OR paediatric* OR infant* OR baby OR newborn* OR babies OR neonate* OR adolescent* OR adolescence OR teenager* OR teen* OR youth* OR toddler* OR preschool* OR "school age" or "school aged" OR juvenile*)<br>AND LANGUAGES: (ENGLISH)<br>Timespan: 1964-2021. Indexes: SCI-EXPANDED, SSCI, A&HCI, CPCI-S, CPCI-SSH, BKCI-S, BKCI-SSH, ESCI, CCR-EXPANDED, IC. | English, 1964-2021             | 389         |
| Google Scholar         | Ankyloglossia "tongue tie" "short lingual frenulum" AND child children pediatric juvenile paediatric                                                                                                                                                                                                                                                                                                                                                                                                                                                                                                                                                                                                          | —                              | 57 uploaded |

Databases were searched on October 14, 2021; Google Scholar was searched on October 15, 2021. Searches were repeated on January 9, 2023.
