# Supplementary material
Source: publisher figshare collection journal article supplement (https://asha.figshare.com/articles/dataset/_/23900199)
Supplement: Supplementary file 4 [file 1]

## Supplemental Material S4. Studies excluded as low quality.

1. Amir LH, James JP, Beatty J. Review of tongue-tie release at a tertiary maternity hospital. *J Paediatr Child Health*. 2005;41(5-6):243-245.
2. Ata N, Alataş N, Yılmaz E, Adam AB, Gezgin B. The relationship of ankyloglossia with gender in children and the ideal timing of surgery in ankyloglossia. *Ear Nose Throat J*. 2021;100(3):NP158-NP160.
3. Bawazir OA, Bawazir AO, Bawazir RO, Bawazir FA, Halabi NF. Experiences and outcomes of frenotomy in children with ankyloglossia in multiple tertiary centers in Saudi Arabia. *J Clin Neonatol*. 2021;10(2):103-107.
4. Chandrasekaran PV, Palaniappan J, Rajendran A, Venugopal B, Gnanamoorthy P. Prevalence of ankyloglossia among children reporting with speech pathology to District Early Intervention Centre (DEIC)—an observational study. *J Evol Med Dent Sci*. 2020;9(11):860-862.
5. Chaturvedi R, Kumar A, Kumar V, Tuli A. Ankyloglossia in deciduous dentition. *Indian J Dent Sci*. 2012;4(4):78-80.
6. Crippa R, Paglia M, Ferrante F, Ottonello A, Angiero F. Tongue-tie assessment: clinical aspects and a new diode laser technique for its management. *Eur J Paediatr Dent*. 2016;17(3):220-222.
7. Daggumati S, Cohn JE, Brennan MJ, Evarts M, McKinnon BJ, Terk AR. Caregiver perception of speech quality in patients with ankyloglossia: comparison between surgery and non-treatment. *Int J Pediatr Otorhinolaryngol*. 2019;119:70-74.
8. Daggumati S, Cohn JE, Brennan MJ, Evarts M, McKinnon BJ, Terk AR. Speech and language outcomes in patients with ankyloglossia undergoing frenulectomy: a retrospective pilot study. *OTO Open*. 2019;3(1):2473974x19826943.
9. Dollberg S, Manor Y, Makai E, Botzer E. Evaluation of speech intelligibility in children with tongue-tie. *Acta Paediatr*. 2011;100(9):e125-e127.
10. Fanibunda K, Adams A. Are the features of ankyloglossia limited to the lingual fraenum? *Dent Update*. 1998;25(7):296-297.
11. Gadve VR, Dhote VS. Step wise management of asyndromic tooth agenesis with ankyloglossia: a case report. *JCDR*. Published online 2021.
12. Glynn RW, Colreavy M, Rowley H, Gendy S. Division of tongue tie: review of practice through a tertiary paediatric otorhinolaryngology service. *Int J Pediatr Otorhinolaryngol*. 2012;76(10):1434-1436.
13. Ito Y, Shimizu T, Nakamura T, Takatama C. Effectiveness of tongue-tie division for speech disorder in children. *Pediatr Int*. 2015;57(2):222-226.
14. Jaikaria A, Pahuja SK, Thakur S, Negi P. Treatment of partial ankyloglossia using Hazelbaker Assessment Tool for Lingual Frenulum Function (HATLFF): a case report with 6-month follow-up. *Natl J Maxillofac Surg*. 2021;12(2):280-283.
15. Karabulut R, Sönmez K, Türkyilmaz Z, et al. Ankyloglossia and effects on breast-feeding, speech problems and mechanical/social issues in children. *B-ENT*. 2008;4(2):81-85.
16. Ketty N, Sciuillo PA. Ankyloglossia with psychological implications. *ASDC J Dent Child*. 1974;41(1):43-46.
17. Klockars T, Pitkäranta A. Pediatric tongue-tie division: indications, techniques and patient satisfaction. *Int J Pediatr Otorhinolaryngol*. 2009;73(10):1399-1401.
18. Madhusudhan K. Untying the tongue tie: a case report. *J Int Med Dent*. 2017;4(3):72-75.
19. Mettias B, O'Brien R, Khatwa MMA, Nasrallah L, Doddi M. Division of tongue tie as an outpatient procedure. Technique, efficacy and safety. *Int J Pediatr Otorhinolaryngol*. 2013;77(4):550-552.
20. Mubtasum H. Ankyloglossia (tongue-tie). *Guident*. 2011;4(8):80-81.
21. Oliveira Melo NSF, Lima A, Ângela F, Silva RPGVC. Ankyloglossia: case report. *RSBO*. 2011;8(1):93-98.
22. Page TA, Lai J, Zheng L, Webster KL, Gill AC. Retrospective quality audit of frenotomy for neonatal tongue-tie. *Breastfeed Rev*. 2019;27(1):13-19.
23. Ramoser G, Guóth-Gumberger M, Baumgartner-Sigl S, Zoeggeler T, Scholl-Bürgi S, Karall D. Frenotomy for tongue-tie (frenulum linguae breve) showed improved symptoms in the short- and long-term follow-up. *Acta Paediatr*. 2019;108(10):1861-1866.
24. Riskin A, Mansovsky M, Coler-Botzer T, et al. Tongue-tie and breastfeeding in newborns—mothers' perspective. *Breastfeed Med*. 2014;9(9):430-437.
25. Roopavathi K, VenuGopal S, Pushpalatha G, Bennadi D, Santosh R, Madhura A. Ankyloglossia and quality of life. *World J Dent*. 2015;6:112-115.
26. Shanavas A, Jayan A, Nadil A, Saji A, Ashmi A, Kunjumon DR. Ankyloglossia: a case report. *Annoor J Sci Res*. 2020;3(1):258-260.
27. Sharma N, Chander S, Singh S, Babaji P. Ankyloglossia (tongue-tie): a series of 2 case reports. *Indian J Stomatol*. 2012;3(3):205-207.
28. Wright JE. Tongue-tie. *J Paediatr Child Health*. 1995;31(4):276-278.
